# Supplementary material for: A gonococcal homologue of meningococcal γ-glutamyl transpeptidase gene is a new type of bacterial pseudogene that is transcriptionally active but phenotypically silent
Source: Springer Nature journal article supplement (doi:10.1186/1471-2180-5-56), 2005-10-04
Supplement: Additional file 1 [file 1471-2180-5-56-s1.pdf]

|           |      |                                                                |      |
|-----------|------|----------------------------------------------------------------|------|
| H44/76    | 1    | ATGCCCTGTATGAATCATCAATCAAACCTCA-----GGCGAAGGAGTGTCTGTGGCTAAA   | 54   |
| H114/90   | 1    | ATGCCCTGTATGAATCATCAATCAAACCTCA-----GGCGAAGGAGTGTCTGTGGCTAAA   | 54   |
| ATCC49226 | 1    | ATGCCCTGTATGAATCATCAATCAAACCTCA-----GGCGAAGGAGTGTCTGTGGCTAAA   | 54   |
| NIID54    | 1    | ATGCCCTGTATGAATCATCAATCAAACCTCA-----GGCGAAGGAGTGTCTGTGGCTAAA   | 60   |
| NIID103   | 1    | ATGCCCTGTATGAATCATCAATCAAACCTCA-----GGCGAAGGAGTGTCTGTGGCTAAA   | 60   |
| NIID106   | 1    | ATGCCCTGTATGAATCATCAATCAAACCTCA-----GGCGAAGGAGTGTCTGTGGCTAAA   | 54   |
| *****     |      |                                                                |      |
| H44/76    | 55   | ACATATTTATTGACTGCATTGATAATGTCTATGACAATCTCTGGATGTCAAGTGCATCCAT  | 114  |
| H114/90   | 55   | ACATATTTATTGACTGCATTGATAATGTCTATGACAATCTCTGGATGTCAAGTGCATCCAT  | 114  |
| ATCC49226 | 55   | ACATATTTATTGACTGCATTGATAATGTCTATGACAATCTCTGGATGTCAAGTGCATCCAT  | 114  |
| NIID54    | 61   | ACATATTTATTGACTGCATTGATAATGTCTATGACAATCTCTGGATGTCAAGTGCATCCAT  | 120  |
| NIID103   | 61   | ACATATTTATTGACTGCATTGATAATGTCTATGACAATCTCTGGATGTCAAGTGCATCCAT  | 120  |
| NIID106   | 55   | ACATATTTATTGACTGCATTGATAATGTCTATGACAATCTCTGGATGTCAAGTGCATCCAT  | 114  |
| *****     |      |                                                                |      |
| H44/76    | 115  | GCCAATCAAGGTAAGGTTAATACTCATTCTGCTGTCATCACAGGTGCAGACGCTCACACG   | 174  |
| H114/90   | 115  | GCCAATCAAGGTAAGGTTAATACTCATTCTGCTGTCATCACAGGTGCAGACGCTCACACG   | 174  |
| ATCC49226 | 115  | GCCAATCAAGGTAAGGTTAATACTCATTCTGCTGTCATCACAGGTGCAGACGCTCACACG   | 174  |
| NIID54    | 121  | GCCAATCAAGGTAAGGTTAATACTCATTCTGCTGTCATCACAGGTGCAGACGCTCACACG   | 180  |
| NIID103   | 121  | GCCAATCAAGGTAAGGTTAATACTCATTCTGCTGTCATCACAGGTGCAGACGCTCACACG   | 180  |
| NIID106   | 115  | GCCAATCAAGGTAAGGTTAATACTCATTCTGCTGTCATCACAGGTGCAGACGCTCACACG   | 174  |
| *****     |      |                                                                |      |
| H44/76    | 175  | CCTGAACATGCAACGGGACTGACCGAACAAAGAGCAGGTGATTGCAAGTGATTTTATAGTA  | 234  |
| H114/90   | 175  | CCTGAACATGCAACGGGACTGACCGAACAAAGAGCAGGTGATTGCAAGTGATTTTATAGTA  | 234  |
| ATCC49226 | 175  | CCTGAACATGCAACGGGACTGACCGAACAAAGAGCAGGTGATTGCAAGTGATTTTATAGTA  | 234  |
| NIID54    | 181  | CCTGAACATGCAACGGGACTGACCGAACAAAGAGCAGGTGATTGCAAGTGATTTTATAGTA  | 240  |
| NIID103   | 181  | CCTGAACATGCAACGGGACTGACCGAACAAAGAGCAGGTGATTGCAAGTGATTTTATAGTA  | 240  |
| NIID106   | 175  | CCTGAACATGCAACGGGACTGACCGAACAAAGAGCAGGTGATTGCAAGTGATTTTATAGTA  | 234  |
| *****     |      |                                                                |      |
| H44/76    | 235  | CGCTCAGCCAAATCCATTAGCAACACAAGCTGGCTATGATATCTTAAAGCAAGGCGGTAGC  | 294  |
| H114/90   | 235  | CGCTCAGCCAAATCCATTAGCAACACAAGCTGGCTATGATATCTTAAAGCAAGGCGGTAGC  | 294  |
| ATCC49226 | 235  | CGCTCAGCCAAATCCATTAGCAACACAAGCTGGCTATGATATCTTAAAGCAAGGCGGTAGC  | 294  |
| NIID54    | 241  | CGCTCAGCCAAATCCATTAGCAACACAAGCTGGCTATGATATCTTAAAGCAAGGCGGTAGC  | 300  |
| NIID103   | 241  | CGCTCAGCCAAATCCATTAGCAACACAAGCTGGCTATGATATCTTAAAGCAAGGCGGTAGC  | 300  |
| NIID106   | 235  | CGCTCAGCCAAATCCATTAGCAACACAAGCTGGCTATGATATCTTAAAGCAAGGCGGTAGC  | 294  |
| *****     |      |                                                                |      |
| H44/76    | 295  | GCTGCAGATGCGATGGTGGCGGTGCAGACGACACTAAGCTTGGTAGAGCCACAGTCTGCTCA | 354  |
| H114/90   | 295  | GCTGCAGATGCGATGGTGGCGGTGCAGACGACACTAAGCTTGGTAGAGCCACAGTCTGCTCA | 354  |
| ATCC49226 | 295  | GCTGCAGATGCGATGGTGGCGGTGCAGACGACACTAAGCTTGGTAGAGCCACAGTCTGCTCA | 354  |
| NIID54    | 295  | GCTGCAGATGCGATGGTGGCGGTGCAGACGACACTAAGCTTGGTAGAGCCACAGTCTGCTCA | 360  |
| NIID103   | 295  | GCTGCAGATGCGATGGTGGCGGTGCAGACGACACTAAGCTTGGTAGAGCCACAGTCTGCTCA | 360  |
| NIID106   | 295  | GCTGCAGATGCGATGGTGGCGGTGCAGACGACACTAAGCTTGGTAGAGCCACAGTCTGCTCA | 354  |
| *****     |      |                                                                |      |
| H44/76    | 355  | GGCTTGGGCGGTGGTGCATTTGTGTTGATTGGGATAATACCGCCAAAACATTGACCACA    | 414  |
| H114/90   | 355  | GGCTTGGGCGGTGGTGCATTTGTGTTGATTGGGATAATACCGCCAAAACATTGACCACA    | 414  |
| ATCC49226 | 355  | GGCTTGGGCGGTGGTGCATTTGTGTTGATTGGGATAATACCGCCAAAACATTGACCACA    | 414  |
| NIID54    | 361  | GGCTTGGGCGGTGGTGCATTTGTGTTGATTGGGATAATACCGCCAAAACATTGACCACA    | 420  |
| NIID103   | 361  | GGCTTGGGCGGTGGTGCATTTGTGTTGATTGGGATAATACCGCCAAAACATTGACCACA    | 420  |
| NIID106   | 355  | GGCTTGGGCGGTGGTGCATTTGTGTTGATTGGGATAATACCGCCAAAACATTGACCACA    | 414  |
| *****     |      |                                                                |      |
| H44/76    | 361  | TTTGATGGGCGGTGAGACGGCACCGATGCGTGCAGCGCGGAATTTTGGATAAAGAT       | 474  |
| H114/90   | 361  | TTTGATGGGCGGTGAGACGGCACCGATGCGTGCAGCGCGGAATTTTGGATAAAGAT       | 474  |
| ATCC49226 | 361  | TTTGATGGGCGGTGAGACGGCACCGATGCGTGCAGCGCGGAATTTTGGATAAAGAT       | 474  |
| NIID54    | 421  | TTTGATGGGCGGTGAGACGGCACCGATGCGTGCAGCGCGGAATTTTGGATAAAGAT       | 480  |
| NIID103   | 421  | TTTGATGGGCGGTGAGACGGCACCGATGCGTGCAGCGCGGAATTTTGGATAAAGAT       | 480  |
| NIID106   | 361  | TTTGATGGGCGGTGAGACGGCACCGATGCGTGCAGCGCGGAATTTTGGATAAAGAT       | 474  |
| *****     |      |                                                                |      |
| H44/76    | 475  | GGTCAACCATTTGAAATTTATGGAAGCGGTGGTGGTGGTGGTGGTGGTGGTGGTGGTGGT   | 534  |
| H114/90   | 475  | GGTCAACCATTTGAAATTTATGGAAGCGGTGGTGGTGGTGGTGGTGGTGGTGGTGGTGGT   | 534  |
| ATCC49226 | 475  | GGTCAACCATTTGAAATTTATGGAAGCGGTGGTGGTGGTGGTGGTGGTGGTGGTGGTGGT   | 534  |
| NIID54    | 481  | GGTCAACCATTTGAAATTTATGGAAGCGGTGGTGGTGGTGGTGGTGGTGGTGGTGGTGGT   | 533  |
| NIID103   | 481  | GGTCAACCATTTGAAATTTATGGAAGCGGTGGTGGTGGTGGTGGTGGTGGTGGTGGTGGT   | 533  |
| NIID106   | 475  | GGTCAACCATTTGAAATTTATGGAAGCGGTGGTGGTGGTGGTGGTGGTGGTGGTGGTGGT   | 527  |
| *****     |      |                                                                |      |
| H44/76    | 535  | ATCCCTAAACTGATGGAGACAATACATCAGCGATACCGGTGATTGCCTTGGGGAAAATTA   | 594  |
| H114/90   | 535  | ATCCCTAAACTGATGGAGACAATACATCAGCGATACCGGTGATTGCCTTGGGGAAAATTA   | 594  |
| ATCC49226 | 528  | ATCCCTAAACTGATGGAGACAATACATCAGCGATACCGGTGATTGCCTTGGGGAAAATTA   | 587  |
| NIID54    | 534  | ATCCCTAAACTGATGGAGACAATACATCAGCGATACCGGTGATTGCCTTGGGGAAAATTA   | 593  |
| NIID103   | 534  | ATCCCTAAACTGATGGAGACAATACATCAGCGATACCGGTGATTGCCTTGGGGAAAATTA   | 593  |
| NIID106   | 528  | ATCCCTAAACTGATGGAGACAATACATCAGCGATACCGGTGATTGCCTTGGGGAAAATTA   | 587  |
| *****     |      |                                                                |      |
| NIID103   | 595  | TTTGATACGCCGATCCACTTGGCAAAAACAAGGCTTTGAGGTGTCGCCAAGGCTTGGCCATC | 654  |
| ATCC49226 | 595  | TTTGATACGCCGATCCACTTGGCAAAAACAAGGCTTTGAGGTGTCGCCAAGGCTTGGCCATC | 654  |
| NIID54    | 588  | TTTGATACGCCGATCCACTTGGCAAAAACAAGGCTTTGAGGTGTCGCCAAGGCTTGGCCATC | 647  |
| NIID106   | 594  | TTTGATACGCCGATCCACTTGGCAAAAACAAGGCTTTGAGGTGTCGCCAAGGCTTGGCCATC | 653  |
| H114/90   | 594  | TTTGATACGCCGATCCACTTGGCAAAAACAAGGCTTTGAGGTGTCGCCAAGGCTTGGCCATC | 653  |
| H44/76    | 588  | TTTGATACGCCGATCCACTTGGCAAAAACAAGGCTTTGAGGTGTCGCCAAGGCTTGGCCATC | 647  |
| *****     |      |                                                                |      |
| H44/76    | 655  | TCGGTTGAGCAAAATCAGCAGCATTGGCACGCTATCCAAAACAGCCGCTATTTTTTTG     | 714  |
| H114/90   | 655  | TCGGTTGAGCAAAATCAGCAGCATTGGCACGCTATCCAAAACAGCCGCTATTTTTTTG     | 714  |
| ATCC49226 | 648  | TCGGTTGAGCAAAATCAGCAGCATTGGCACGCTATCCAAAACAGCCGCTATTTTTTTG     | 707  |
| NIID54    | 654  | TCGGTTGAGCAAAATCAGCAGCATTGGCACGCTATCCAAAACAGCCGCTATTTTTTTG     | 713  |
| NIID103   | 654  | TCGGTTGAGCAAAATCAGCAGCATTGGCACGCTATCCAAAACAGCCGCTATTTTTTTG     | 713  |
| NIID106   | 648  | TCGGTTGAGCAAAATCAGCAGCATTGGCACGCTATCCAAAACAGCCGCTATTTTTTTG     | 707  |
| *****     |      |                                                                |      |
| H44/76    | 715  | CCGAATGGTGTGCCGCTACAAGCAGCGAGCTTGCTGAAAATTTAGAAATTTGCTGACAGT   | 774  |
| H114/90   | 715  | CCGAATGGTGTGCCGCTACAAGCAGCGAGCTTGCTGAAAATTTAGAAATTTGCTGACAGT   | 774  |
| ATCC49226 | 708  | CCGAATGGTGTGCCGCTACAAGCAGCGAGCTTGCTGAAAATTTAGAAATTTGCTGACAGT   | 767  |
| NIID54    | 714  | CCGAATGGTGTGCCGCTACAAGCAGCGAGCTTGCTGAAAATTTAGAAATTTGCTGACAGT   | 773  |
| NIID103   | 714  | CCGAATGGTGTGCCGCTACAAGCAGCGAGCTTGCTGAAAATTTAGAAATTTGCTGACAGT   | 773  |
| NIID106   | 708  | CCGAATGGTGTGCCGCTACAAGCAGCGAGCTTGCTGAAAATTTAGAAATTTGCTGACAGT   | 767  |
| *****     |      |                                                                |      |
| H44/76    | 775  | GTTACAGCGTTAGCAGCTCAAGGTGCAAAAGCTCTGCATACCTGGTAAATATGCCCAAAAT  | 834  |
| H114/90   | 775  | GTTACAGCGTTAGCAGCTCAAGGTGCAAAAGCTCTGCATACCTGGTAAATATGCCCAAAAT  | 834  |
| ATCC49226 | 768  | GTTACAGCGTTAGCAGCTCAAGGTGCAAAAGCTCTGCATACCTGGTAAATATGCCCAAAAT  | 827  |
| NIID54    | 774  | GTTACAGCGTTAGCAGCTCAAGGTGCAAAAGCTCTGCATACCTGGTAAATATGCCCAAAAT  | 833  |
| NIID103   | 774  | GTTACAGCGTTAGCAGCTCAAGGTGCAAAAGCTCTGCATACCTGGTAAATATGCCCAAAAT  | 833  |
| NIID106   | 768  | GTTACAGCGTTAGCAGCTCAAGGTGCAAAAGCTCTGCATACCTGGTAAATATGCCCAAAAT  | 827  |
| *****     |      |                                                                |      |
| H44/76    | 835  | ATCGTTTTCAGTTGTCCAAAATGCTAAGGATAACCCCGGTCAATATCCTTACAAGATTTA   | 894  |
| H114/90   | 835  | ATCGTTTTCAGTTGTCCAAAATGCTAAGGATAACCCCGGTCAATATCCTTACAAGATTTA   | 894  |
| ATCC49226 | 828  | ATCGTTTTCAGTTGTCCAAAATGCTAAGGATAACCCCGGTCAATATCCTTACAAGATTTA   | 887  |
| NIID54    | 834  | ATCGTTTTCAGTTGTCCAAAATGCTAAGGATAACCCCGGTCAATATCCTTACAAGATTTA   | 893  |
| NIID103   | 834  | ATCGTTTTCAGTTGTCCAAAATGCTAAGGATAACCCCGGTCAATATCCTTACAAGATTTA   | 893  |
| NIID106   | 828  | ATCGTTTTCAGTTGTCCAAAATGCTAAGGATAACCCCGGTCAATATCCTTACAAGATTTA   | 887  |
| *****     |      |                                                                |      |
| H44/76    | 895  | TCTGATATCAAGTGGTGGAAAGCCCGCCTGTTTGTGTGACTTATCGTATTTATGAAGTA    | 954  |
| H114/90   | 895  | TCTGATATCAAGTGGTGGAAAGCCCGCCTGTTTGTGTGACTTATCGTATTTATGAAGTA    | 954  |
| ATCC49226 | 888  | TCTGATATCAAGTGGTGGAAAGCCCGCCTGTTTGTGTGACTTATCGTATTTATGAAGTA    | 947  |
| NIID54    | 894  | TCTGATATCAAGTGGTGGAAAGCCCGCCTGTTTGTGTGACTTATCGTATTTATGAAGTA    | 953  |
| NIID103   | 894  | TCTGATATCAAGTGGTGGAAAGCCCGCCTGTTTGTGTGACTTATCGTATTTATGAAGTA    | 953  |
| NIID106   | 888  | TCTGATATCAAGTGGTGGAAAGCCCGCCTGTTTGTGTGACTTATCGTATTTATGAAGTA    | 947  |
| *****     |      |                                                                |      |
| H44/76    | 955  | TGCGGTATGGGTGCACCAAGCTCAGGTGGGATGCTGTGGGTGAGATTTGGGGATTTTA     | 1014 |
| H114/90   | 955  | TGCGGTATGGGTGCACCAAGCTCAGGTGGGATGCTGTGGGTGAGATTTGGGGATTTTA     | 1014 |
| ATCC49226 | 948  | TGCGGTATGGGTGCACCAAGCTCAGGTGGGATGCTGTGGGTGAGATTTGGGGATTTTA     | 1007 |
| NIID54    | 954  | TGCGGTATGGGTGCACCAAGCTCAGGTGGGATGCTGTGGGTGAGATTTGGGGATTTTA     | 1013 |
| NIID103   | 954  | TGCGGTATGGGTGCACCAAGCTCAGGTGGGATGCTGTGGGTGAGATTTGGGGATTTTA     | 1013 |
| NIID106   | 948  | TGCGGTATGGGTGCACCAAGCTCAGGTGGGATGCTGTGGGTGAGATTTGGGGATTTTA     | 1007 |
| *****     |      |                                                                |      |
| H44/76    | 1015 | AATGAATTTTACCCAATCAGTGGGGTATGATGCTGAAGGTTTACGCTCTTGGGGCGAC     | 1074 |
| H114/90   | 1015 | AATGAATTTTACCCAATCAGTGGGGTATGATGCTGAAGGTTTACGCTCTTGGGGCGAC     | 1074 |
| ATCC49226 | 1008 | AATGAATTTTACCCAATCAGTGGGGTATGATGCTGAAGGTTTACGCTCTTGGGGCGAC     | 1067 |
| NIID54    | 1014 | AATGAATTTTACCCAATCAGTGGGGTATGATGCTGAAGGTTTACGCTCTTGGGGCGAT     | 1073 |
| NIID103   | 1014 | AATGAATTTTACCCAATCAGTGGGGTATGATGCTGAAGGTTTACGCTCTTGGGGCGAT     | 1073 |
| NIID106   | 1008 | AATGAATTTTACCCAATCAGTGGGGTATGATGCTGAAGGTTTACGCTCTTGGGGCGAT     | 1067 |
| *****     |      |                                                                |      |
| H44/76    | 1075 | GCTTCTAGGCTTGCCTTTGCGGATCGTGATGATAT-----                       | 1100 |
| H114/90   | 1075 | GCTTCTAGGCTTGCCTTTGCGGATCGTGATGATAT-----                       | 1100 |
| ATCC49226 | 1074 | GCTTCTAGGCTTGCCTTTGCGGATCGTGATGATATCTTGGGCGATGCTTCTAGGCTTGC    | 1127 |
| NIID54    | 1074 | GCTTCTAGGCTTGCCTTTGCGGATCGTGATGATAT-----                       | 1109 |
| NIID103   | 1074 | GCTTCTAGGCTTGCCTTTGCGGATCGTGATGATATCTTGGGCGATGCTTCTAGGCTTGC    | 1133 |
| NIID106   | 1068 | GCTTCTAGGCTTGCCTTTGCGGATCGTGATGATAT-----                       | 1103 |
| *****     |      |                                                                |      |
| H44/76    | 1101 | -----TTGGGCGACCTGATTTTGTACCAGTACCCATTTCGCCA                    | 1138 |
| H114/90   | 1101 | -----TTGGGCGACCTGATTTTGTACCAGTACCCATTTCGCCA                    | 1138 |
| ATCC49226 | 1128 | -----TTGGGCGACCTGATTTTGTACCAGTACCCATTTCGCCA                    | 1187 |
| NIID54    | 1110 | -----TTGGGCGACCTGATTTTGTACCAGTACCCATTTCGCCA                    | 1147 |
| NIID103   | 1134 | -----TTGGGCGACCTGATTTTGTACCAGTACCCATTTCGCCA                    | 1193 |
| NIID106   | 1103 | -----TTGGGCGACCTGATTTTGTACCAGTACCCATTTCGCCA                    | 1141 |
| *****     |      |                                                                |      |
| H44/76    | 1139 | GTTGATTTCTAAAGACTACCTAAAACATCGCAGCCAGCTGCTTGAGCAGTCGGATAAGGC   | 1198 |
| H114/90   | 1139 | GTTGATTTCTAAAGACTACCTAAAACATCGCAGCCAGCTGCTTGAGCAGTCGGATAAGGC   | 1198 |
| ATCC49226 | 1188 | GTTGATTTCTAAAGACTACCTAAAACATCGCAGCCAGCTGCTTGAGCAGTCGGATAAGGC   | 1247 |
| NIID54    | 1148 | GTTGATTTCTAAAGACTACCTAAAACATCGCAGCCAGCTGCTTGAGCAGTCGGATAAGGC   | 1207 |
| NIID103   | 1194 | GTTGATTTCTAAAGACTACCTAAAACATCGCAGCCAGCTGCTTGAGCAGTCGGATAAGGC   | 1253 |
| NIID106   | 1142 | GTTGATTTCTAAAGACTACCTAAAACATCGCAGCCAGCTGCTTGAGCAGTCGGATAAGGC   | 1201 |
| *****     |      |                                                                |      |
| H44/76    | 1199 | ATTGCTTAGCGTATCTGCAGGCGATTTTATTCATGAGTGGGTGCTTCAACAGCGATTGA    | 1258 |
| H114/90   | 1199 | ATTGCTTAGCGTATCTGCAGGCGATTTTATTCATGAGTGGGTGCTTCAACAGCGATTGA    | 1258 |
| ATCC49226 | 1248 | ATTGCTTAGCGTATCTGCAGGCGATTTTATTCATGAGTGGGTGCTTCAACAGCGATTGA    | 1307 |
| NIID54    | 1208 | ATTGCTTAGCGTATCTGCAGGCGATTTTATTCATGAGTGGGTGCTTCAACAGCGATTGA    | 1267 |
| NIID103   | 1254 | ATTGCTTAGCGTATCTGCAGGCGATTTTATTCATGAGTGGGTGCTTCAACAGCGATTGA    | 1313 |
| NIID106   | 1202 | ATTGCTTAGCGTATCTGCAGGCGATTTTATTCATGAGTGGGTGCTTCAACAGCGATTGA    | 1261 |
| *****     |      |                                                                |      |
| H44/76    | 1259 | GTTACCTTCTACCAAGTCAATATCAATTTGGGATAAAGCGGGCAATGTGCTATCAATGAC   | 1318 |
| H114/90   | 1259 | GTTACCTTCTACCAAGTCAATATCAATTTGGGATAAAGCGGGCAATGTGCTATCAATGAC   | 1318 |
| ATCC49226 | 1308 | GTTACCTTCTACCAAGTCAATATCAATTTGGGATAAAGCGGGCAATGTGCTATCAATGAC   | 1367 |
| NIID54    | 1268 | GTTACCTTCTACCAAGTCAATATCAATTTGGGATAAAGCGGGCAATGTGCTATCAATGAC   | 1327 |
| NIID103   | 1314 | GTTACCTTCTACCAAGTCAATATCAATTTGGGATAAAGCGGGCAATGTGCTATCAATGAC   | 1373 |
| NIID106   | 1262 | GTTACCTTCTACCAAGTCAATATCAATTTGGGATAAAGCGGGCAATGTGCTATCAATGAC   | 1321 |
| *****     |      |                                                                |      |
| H44/76    | 1319 | GACTTCCATTGAAAATGCGTTTGGCTCAACTTTGATGGCAAAATGGTACCTGCTGAATAA   | 1378 |
| H114/90   | 1319 | GACTTCCATTGAAAATGCGTTTGGCTCAACTTTGATGGCAAAATGGTACCTGCTGAATAA   | 1378 |
| ATCC49226 | 1368 | GACTTCCATTGAAAATGCGTTTGGCTCAACTTTGATGGCAAAATGGTACCTGCTGAATAA   | 1427 |
| NIID54    | 1328 | GACTTCCATTGAAAATGCGTTTGGCTCAACTTTGATGGCAAAATGGTACCTGCTGAATAA   | 1387 |
| NIID103   | 1374 | GACTTCCATTGAAAATGCGTTTGGCTCAACTTTGATGGCAAAATGGTACCTGCTGAATAA   | 1433 |
| NIID106   | 1322 | GACTTCCATTGAAAATGCGTTTGGCTCAACTTTGATGGCAAAATGGTACCTGCTGAATAA   | 1381 |
| *****     |      |                                                                |      |
| H44/76    | 1379 | TGAGCTGACAGACTTTAGTTTTGAGCCAAATAAGCAGGGCAACAGGTGCGCAATCGTGT    | 1438 |
| H114/90   | 1379 | TGAGCTGACAGACTTTAGTTTTGAGCCAAATAAGCAGGGCAACAGGTGCGCAATCGTGT    | 1438 |
| ATCC49226 | 1428 | TGAGCTGACAGACTTTAGTTTTGAGCCAAATAAGCAGGGCAACAGGTGCGCAATCGTGT    | 1487 |
| NIID54    | 1388 | TGAGCTGACAGACTTTAGTTTTGAGCCAAATAAGCAGGGCAACAGGTGCGCAATCGTGT    | 1447 |
| NIID103   | 1434 | TGAGCTGACAGACTTTAGTTTTGAGCCAAATAAGCAGGGCAACAGGTGCGCAATCGTGT    | 1493 |
| NIID106   | 1382 | TGAGCTGACAGACTTTAGTTTTGAGCCAAATAAGCAGGGCAACAGGTGCGCAATCGTGT    | 1441 |
| *****     |      |                                                                |      |
| H44/76    | 1439 | CGAGCCCGGCAAGAGACCAGCTCCTCAATGGCACCAACCATCGTATTTAAAGCAGGCAA    | 1498 |
| H114/90   | 1439 | CGAGCCCGGCAAGAGACCAGCTCCTCAATGGCACCAACCATCGTATTTAAAGCAGGCAA    | 1498 |
| ATCC49226 | 1488 | CGAGCCCGGCAAGAGACCAGCTCCTCAATGGCACCAACCATCGTATTTAAAGCAGGCAA    | 1547 |
| NIID54    | 1448 | CGAGCCCGGCAAGAGACCAGCTCCTCAATGGCACCAACCATCGTATTTAAAGCAGGCAA    | 1507 |
| NIID103   | 1494 | CGAGCCCGGCAAGAGACCAGCTCCTCAATGGCACCAACCATCGTATTTAAAGCAGGCAA    | 1553 |
| NIID106   | 1442 | CGAGCCCGGCAAGAGACCAGCTCCTCAATGGCACCAACCATCGTATTTAAAGCAGGCAA    | 1501 |
| *****     |      |                                                                |      |
| H44/76    | 1499 | GCCTTATATGGCAATCGGCTCCCGAGTGGTGGTGGTGGTGGTGGTGGTGGTGGTGGTGGT   | 1558 |
| H114/90   | 1499 | GCCTTATATGGCAATCGGCTCCCGAGTGGTGGTGGTGGTGGTGGTGGTGGTGGTGGTGGT   | 1558 |
| ATCC49226 | 1548 | GCCTTATATGGCAATCGGCTCCTCAGGTGGTGGTGGTGGTGGTGGTGGTGGTGGTGGTGGT  | 1607 |
| NIID54    | 1508 | GCCTTATATGGCAATCGGCTCCTCAGGTGGTGGTGGTGGTGGTGGTGGTGGTGGTGGTGGT  | 1567 |
| NIID103   | 1554 | GCCTTATATGGCAATCGGCTCCTCAGGTGGTGGTGGTGGTGGTGGTGGTGGTGGTGGTGGT  | 1613 |
| NIID106   | 1502 | GCCTTATATGGCAATCGGCTCCTCAGGTGGTGGTGGTGGTGGTGGTGGTGGTGGTGGTGGT  | 1561 |
| *****     |      |                                                                |      |
| H44/76    | 1559 | GATTGTGGCAGATAGTACTGGAATATGGATATCCAAATGCCATCAGTGCACCAATTT      | 1618 |
| H114/90   | 1559 | GATTGTGGCAGATAGTACTGGAATATGGATATCCAAATGCCATCAGTGCACCAATTT      | 1618 |
| ATCC49226 | 1608 | GATTGTGGCAGATAGTACTGGAATATGGATATCCAAATGCCATCAGTGCACCAATTT      | 1667 |
| NIID54    | 1614 | GATTGTGGCAGATAGTACTGGAATATGGATATCCAAATGCCATCAGTGCACCAATTT      | 1627 |
| NIID103   | 1614 | GATTGTGGCAGATAGTACTGGAATATGGATATCCAAATGCCATCAGTGCACCAATTT      | 1673 |
| NIID106   | 1562 | GATTGTGGCAGATAGTACTGGAATATGGATATCCAAATGCCATCAGTGCACCAATTT      | 1621 |
| *****     |      |                                                                |      |
| H44/76    | 1619 | ATTAATCGCTTTGGTAGCTATGAACTAGAAACCGGTTACAACCGCGTCCAGTGGCAACA    | 1678 |
| H114/90   | 1619 | ATTAATCGCTTTGGTAGCTATGAACTAGAAACCGGTTACAACCGCGTCCAGTGGCAACA    | 1678 |
| ATCC49226 | 1668 | ATTAATCGCTTTGGTAGCTATGAACTAGAAACCGGTTACAACCGCGTCCAGTGGCAACA    | 1727 |
| NIID54    | 1628 | ATTAATCGCTTTGGTAGCTATGAACTAGAAACCGGTTACAACCGCGTCCAGTGGCAACA    | 1687 |
| NIID103   | 1674 | ATTAATCGCTTTGGTAGCTATGAACTAGAAACCGGTTACAACCGCGTCCAGTGGCAACA    | 1733 |
| NIID106   | 1622 | ATTAATCGCTTTGGTAGCTATGAACTAGAAACCGGTTACAACCGCGTCCAGTGGCAACA    | 1681 |
| *****     |      |                                                                |      |
| H44/76    | 1679 | AGCATTAAATGATTTGGGCTATAAGACTGATGTGCGTGAATTTCAAGTGTTCACAGC      | 1738 |
| H114/90   | 1679 | AGCATTAAATGATTTGGGCTATAAGACTGATGTGCGTGAATTTCAAGTGTTCACAGC      | 1738 |
| ATCC49226 | 1728 | AGCATTAAATGATTTGGGCTATAAGACTGATGTGCGTGAATTTCAAGTGTTCACAGC      | 1787 |
| NIID54    | 1688 | AGCATTAAATGATTTGGGCTATAAGACTGATGTGCGTGAATTTCAAGTGTTCACAGC      | 1747 |
| NIID103   | 1734 | AGCATTAAATGATTTGGGCTATAAGACTGATGTGCGTGAATTTCAAGTGTTCACAGC      |      |
